# Supplementary material for: Quercetin as a Therapeutic Product: Evaluation of Its Pharmacological Action and Clinical Applications—A Review
Source: MDPI journal article supplement (doi:10.3390/ph16111631), 2023-11-20
Supplement: s1 [file s1]

## Supporting Information

**Table S1.** Globally available marketed products of quercetin (products ranges from 100 mg to 1500 mg).

| S.No | Product                                          | Serving Size (and form)            | Amount per serving                                                          | Net Contents              | Website                                                                          |
|------|--------------------------------------------------|------------------------------------|-----------------------------------------------------------------------------|---------------------------|----------------------------------------------------------------------------------|
| 1.   | Absorb Health Quercetin                          | 1.0 Capsule(s)                     | 500 mg                                                                      | 100 Capsule(s)            | <a href="http://www.absorbyourhealth.com">www.absorbyourhealth.com</a>           |
| 2.   | Allergy Research Group Quercetin                 | 2.0 Capsule(s)                     | 300 mg                                                                      | 60 Vegetarian Capsule(s)  | <a href="http://www.allergyresearchgroup.com">www.allergyresearchgroup.com</a>   |
| 3.   | Allergy Research Group Quercetin Bioflavonoids   | 2.0 Capsule(s)                     | 100 mg                                                                      | 100 Vegetarian Capsule(s) | <a href="http://www.allergyresearchgroup.com">www.allergyresearchgroup.com</a>   |
| 4.   | AN Amazing Nutrition Amazing Formulas Quercetin  | 1.0 Veggie Capsule(s)              | 1,500 mg                                                                    | 120 Veggie Capsule(s)     | <a href="http://www.amazingnutrition.com">www.amazingnutrition.com</a>           |
| 5.   | Bio-Tech Pharmacal Quercetin                     | 1.0 Capsule(s)                     | 400 mg                                                                      | 100 Vegetable Capsule(s)  | <a href="http://www.BioTechPharmacal.com">www.BioTechPharmacal.com</a>           |
| 6.   | BIOVEA Quercetin                                 | 2.0 Vegetarian Capsule(s)          | 500 mg                                                                      | 50 Vegetarian Capsule(s)  | <a href="http://www.biovea.com">www.biovea.com</a>                               |
| 7.   | Bluebonnet Super Quercetin                       | 2.0 Capsule(s)                     | 500 mg                                                                      | 30 Vegetable Capsule(s)   | <a href="http://www.bluebonnetnutrition.com">www.bluebonnetnutrition.com</a>     |
| 8.   | Body Kitchen Mega NAC + Quercetin                | 2.0 Vegetable Capsule(s)           | 600 mg                                                                      | 60 Capsule(s)             | <a href="http://www.mybodykitchen.com">www.mybodykitchen.com</a>                 |
| 9.   | Bronson Quercetin with Bromelain                 | 2.0 Capsule(s)                     | 500 mg                                                                      | 100 Capsule(s)            | <a href="http://www.BronsonVitamins.com">www.BronsonVitamins.com</a>             |
| 10.  | Bronson Laboratories Quercetin & Bromelain       | 1.0 Capsule(s)                     | 250 mg                                                                      | 100 Capsule(s)            |                                                                                  |
| 11.  | Bulk Supplements                                 | 500.0 mg [about 1/2 tsp]           | 500 mg                                                                      | 1.0 KG(s); 35.3 Ounce(s)  | <a href="https://www.bulksupplements.com">https://www.bulksupplements.com</a>    |
| 12.  | Country Life Quercetin + D3                      | 1.0 Capsule(s)                     | 500 mg                                                                      | 90 Vegetarian Capsule(s)  | <a href="http://www.countryLifeVitamins.com">www.countryLifeVitamins.com</a>     |
| 13.  | Designs for Health Quercetin + Nettles           | 3.0 Capsule(s)                     | 600 mg                                                                      | 90 Vegetarian Capsule(s)  | <a href="http://www.designsforhealth.com">www.designsforhealth.com</a>           |
| 14.  | Designs for Health Quercetin- Ascorbate Powder   | 1.0 Gram(s) [approx. 1/4 teaspoon] | 500 mg                                                                      | 100 Gram(s)               | <a href="http://www.designsforhealth.com">www.designsforhealth.com</a>           |
| 15.  | Doctor's Best Quercetin Bromelain                | 2.0 Veggie Capsule(s)              | 500 mg                                                                      | 180 Veggie Cap(s)         | <a href="http://www.drsvitamins.com">www.drsvitamins.com</a>                     |
| 16.  | Double Wood Supplements Quercetin with Bromelain | 2.0 Capsule(s)                     | 1000 mg                                                                     | 120 Capsule(s)            | <a href="http://www.doublewoodsupplements.com">www.doublewoodsupplements.com</a> |
| 17.  | Douglas Laboratories Quercetin Bromelain Complex | 1.0 Tablet(s)                      | 333 mg                                                                      | 100 Tablet(s)             | <a href="http://www.douglaslabs.com">www.douglaslabs.com</a>                     |
| 18.  | Dr. Mercola Quercetin and Pterostilbene Advanced | 2.0 Capsule(s)                     | Quercetin Phytosome Complex from Sophora japonica, contains 34.0% Quercetin | 180 Capsule(s)            |                                                                                  |
| 19.  | Forest Leaf Quercetin Bromelain                  | 2.0 Capsule(s)                     | 500 mg                                                                      | 90 Vegetable Capsule(s)   | <a href="http://www.ForestLeaf.com">www.ForestLeaf.com</a>                       |

|     |                                            |                       |                                         |                          |                          |
|-----|--------------------------------------------|-----------------------|-----------------------------------------|--------------------------|--------------------------|
| 20. | Forest Leaf Quercetin Bromelain            | 2.0 Capsule(s)        | Quercetin, Phospholipid Lecithin 250 mg | 90 Vegetable Capsule(s)  | www.globalhealing.com    |
| 21. | GNC Preventive Nutrition Quercetin         | 1.0 Caplet(s)         | 1000 mg                                 | 60 Caplet(s)             | www.GNC.COM              |
| 22. | Herbadiet Quercetin                        | 1.0 Capsule(s)        | 400 mg                                  | 60 V-Cap(s)              | www.herbadiet.in         |
| 23. | Herbal Secrets Quercetin                   | 1.0 V-cap(s)          | 500 mg                                  | 120 V-cap(s)             | www.herbalsecrets.com    |
| 24. | Innate Response Formulas Quercetin         | 1.0 Tablet(s)         | 500 mg                                  | 90 Tablet(s)             | www.innateresponse.com   |
| 25. | Jarrow Formulas Quercetin                  | 1.0 Capsule(s)        | 500 mg                                  | 200 Veggie Cap(s)        | www.jarrow.com           |
| 26. | KAL Quercetin                              | 1.0 Tablet(s)         | 1000 mg                                 | 60 Tablet(s)             | www.nutrafamily.com      |
| 27. | Mega Food Quercetin Strength               | 1.0 Tablet(s)         | 500 mg                                  | 30 Tablet(s)             | www.megafood.com         |
| 28. | Micro Ingredients Pure Quercetin Dihydrate | 0.5 Gram(s) [1 scoop] | 500 mg                                  | 100 Gram(s); 3.53 Oz(s)  | www.microingredients.com |
| 29. | Moss Nutrition Quercetin                   | 1.0 Capsule(s)        | 300 mg                                  | 60 Vegetarian Capsule(s) | www.mossnutrition.com    |

**Table S2.** Depicts commercial products of quercetin.

| S.No. | Product                                   | Net content            | Recommended daily Dose                                                                                                                                                                                                                        | Amount of Quercetin/ Serving Unit | Manufacturer/ Distributor                  | Website                                                                                                                                                         |
|-------|-------------------------------------------|------------------------|-----------------------------------------------------------------------------------------------------------------------------------------------------------------------------------------------------------------------------------------------|-----------------------------------|--------------------------------------------|-----------------------------------------------------------------------------------------------------------------------------------------------------------------|
| 1.    | Quercetin with Bromelain                  | 60 vegetarian capsules | As a Dietary Supplement for adults, 1 capsule before meal, 2 times daily or as directed by health practitioner.                                                                                                                               | 400 mg                            | Biotrex Nutraceuticals, India              | <a href="https://www.amazon.in/s?k=quercetin+marketed+products&amp;ref=nb_sb_noss">https://www.amazon.in/s?k=quercetin+marketed+products&amp;ref=nb_sb_noss</a> |
| 2.    | "Diagnose to Cure" Quercetin Plus         | 60 vegetarian capsules | 1-2 Capsules with water after meal.                                                                                                                                                                                                           | 500 mg                            | Diagnose to Cure, India                    | <a href="https://www.amazon.in/s?k=quercetin+marketed+products&amp;ref=nb_sb_noss">https://www.amazon.in/s?k=quercetin+marketed+products&amp;ref=nb_sb_noss</a> |
| 3.    | Healthvit Quercetin, Natural Bioflavonoid | 60 capsules            | As a dietary supplement, take 2 capsules 20 minutes before meals, 2-3 times daily. person with sensitive stomach may take capsule with meals. Warning: If you are pregnant, nursing or taking any medication, consult your doctor before use. | 100 mg                            | West Coast Pharmaceutical Works Ltd, India | <a href="https://www.amazon.in/s?k=quercetin+marketed+products&amp;ref=nb_sb_noss">https://www.amazon.in/s?k=quercetin+marketed+products&amp;ref=nb_sb_noss</a> |
| 4.    | Quercetin With Bromelain                  | 60 vegetarian Capsules | 1 veg capsule Daily value (DV) not established                                                                                                                                                                                                | 500 mg                            | Back To Beginnings, India                  | <a href="https://www.amazon.in/s?k=quercetin+marketed+products&amp;ref=nb_sb_noss">https://www.amazon.in/s?k=quercetin+marketed+products&amp;ref=nb_sb_noss</a> |

|     |                                      |                                     |                                                                                                                                                                                                                                                                                                                                        |                                                  |                                      |                                                                                                                                                                               |
|-----|--------------------------------------|-------------------------------------|----------------------------------------------------------------------------------------------------------------------------------------------------------------------------------------------------------------------------------------------------------------------------------------------------------------------------------------|--------------------------------------------------|--------------------------------------|-------------------------------------------------------------------------------------------------------------------------------------------------------------------------------|
|     |                                      |                                     | Dose:3 times a day daily. For adult:1 capsule after breakfast,1 capsule after lunch ,1 capsule after dinner. For children- age 5-10 yr - 1 capsule/ day Age-10 to 15 yrs 2capsule/day                                                                                                                                                  |                                                  |                                      |                                                                                                                                                                               |
| 5.  | Citokain, Quercetin and Bromelain    | 60 capsules                         | Take 2 capsules 20 min before meals, twice daily. Person with sensitive stomach may take capsule with meals. For adults only As a dietary supplement for adults, take two (2) vegetable capsules twice daily, preferably with a meal or as directed by a healthcare practitioner. Not intended for use by pregnant or lactating women. | Quercetin- 350mg Bromelain - 350mg               | Dr. Pravin Rane, India (Maharashtra) | <a href="https://www.amazon.in/s?k=quercetin+marketed+products&amp;ref=nb_sb_noss">https://www.amazon.in/s?k=quercetin+marketed+products&amp;ref=nb_sb_noss</a>               |
| 6.  | Now Foods, Quercetin with Bromelain  | 240 veg capsules                    | Take 2 capsules 20 min before meals, twice daily. Person with sensitive stomach may take capsule with meals. For adults only As a dietary supplement for adults, take two (2) vegetable capsules twice daily, preferably with a meal or as directed by a healthcare practitioner. Not intended for use by pregnant or lactating women. | Quercetin 800 mg * Bromelain (2400 GDU/g) 165 mg | Now Foods, USA                       | <a href="https://www.amazon.in/s?k=quercetin+marketed+products+in+usa&amp;ref=nb_sb_noss">https://www.amazon.in/s?k=quercetin+marketed+products+in+usa&amp;ref=nb_sb_noss</a> |
| 7.  | Quercetin Complex                    | 100 vegetable capsules              | take 1 capsule per day with meals or as directed by your qualified healthcare professional                                                                                                                                                                                                                                             | 500 mg                                           | Solgar, USA                          | <a href="https://www.amazon.in/s?k=quercetin+marketed+products+in+usa&amp;ref=nb_sb_noss">https://www.amazon.in/s?k=quercetin+marketed+products+in+usa&amp;ref=nb_sb_noss</a> |
| 8.  | Jarrow Formulas, Quercetin           | 100 veggie capsules                 | Take 2 capsule, one time daily with a meal. Not intended for use by pregnant or lactating women                                                                                                                                                                                                                                        | 500 mg                                           | Jarrow Formulas, USA                 | <a href="https://www.amazon.in/s?k=quercetin+marketed+products+in+usa&amp;ref=nb_sb_noss">https://www.amazon.in/s?k=quercetin+marketed+products+in+usa&amp;ref=nb_sb_noss</a> |
| 9.  | Natrol - Quercetin                   | 50 capsules, Non-vegetarian product | Take 1 tablet with a meal or a glass of water. Store in cool and dry place. Use only as Directed                                                                                                                                                                                                                                       | 500mg Daily value not established                | Natrol, USA                          | <a href="https://www.amazon.in/s?k=quercetin+marketed+products+in+usa&amp;ref=nb_sb_noss">https://www.amazon.in/s?k=quercetin+marketed+products+in+usa&amp;ref=nb_sb_noss</a> |
| 10. | Quercetin Brand: Kal                 | 60 tablets                          | 3 tablets. 1,2 times daily in divided doses. if you have a delicate, easily irritated                                                                                                                                                                                                                                                  | 1000 mg (Daily value not established)            | Nutraceutical corp. Kal, USA         | <a href="https://www.amazon.in/s?k=quercetin+marketed+products+in+usa&amp;ref=nb_sb_noss">https://www.amazon.in/s?k=quercetin+marketed+products+in+usa&amp;ref=nb_sb_noss</a> |
| 11. | Source Naturals: Activated Quercetin | 100 tablets                         | Take 2 capsules daily, preferably between meals. For added benefit take 2 capsules up to 3 times daily                                                                                                                                                                                                                                 | 1 g                                              | Source Naturals, USA                 | <a href="https://www.amazon.in/s?k=quercetin+marketed+products+in+usa&amp;ref=nb_sb_noss">https://www.amazon.in/s?k=quercetin+marketed+products+in+usa&amp;ref=nb_sb_noss</a> |
| 12. | Doctor's Best, Quercetin Bromelain   | 180 veggie capsules                 | Take 2 capsules daily, preferably between meals. For added benefit take 2 capsules up to 3 times daily                                                                                                                                                                                                                                 | 500mg Daily value not established                | Doctor's Best, California, USA       | <a href="https://www.amazon.in/s?k=quercetin+marketed+products+in+usa&amp;ref=nb_sb_noss">https://www.amazon.in/s?k=quercetin+marketed+products+in+usa&amp;ref=nb_sb_noss</a> |

|     |                                                                                      |                        |                                                                                                                                       |       |                             |                                                                                                                                                                               |
|-----|--------------------------------------------------------------------------------------|------------------------|---------------------------------------------------------------------------------------------------------------------------------------|-------|-----------------------------|-------------------------------------------------------------------------------------------------------------------------------------------------------------------------------|
| 13. | Quercetin<br>with<br>Bromelain<br><br>Brand: Now<br>Foods<br>(Dietary<br>supplement) | 120 veggie<br>capsules | Take 2 capsules<br>20min before meals,<br>twice daily. Person<br>with sensitive<br>stomach may prefer<br>to take capsule with<br>Food | 800mg | Now Foods, USA              | <a href="https://www.amazon.in/s?k=quercetin+marketed+products+in+usa&amp;ref=nb_sb_noss">https://www.amazon.in/s?k=quercetin+marketed+products+in+usa&amp;ref=nb_sb_noss</a> |
| 14. | Solaray<br>Quercetin<br>Capsules                                                     | 90 veg<br>capsules     | 1 veg capsule. Daily<br>value not established                                                                                         | 500mg | Solaray, New<br>Jersey, USA | <a href="https://www.amazon.in/s?k=quercetin+marketed+products+in+usa&amp;ref=nb_sb_noss">https://www.amazon.in/s?k=quercetin+marketed+products+in+usa&amp;ref=nb_sb_noss</a> |
